# Supplementary material for: Kinematic characteristics of multi-directional reaching movement in degenerative cervical myelopathy
Source: Research Square preprint supplement (doi:10.21203/rs.3.rs-8556269/v1), 2026-01-21
Supplement: Supplementary file 1 [file a1708852a30b464c4dda4c45.docx]

Table 3: Results of multiple regression analysis for predicting JOA-UEF recovery rate and STEF improvement rate.

| Dependent variable | R2 | Explanatory variables | Standard β | *P* value |
| --- | --- | --- | --- | --- |
| JOA-UEF recovery rate | 0.25 | STEF recovery rate | 0.50 | < 0.05 |
| STEF improvement rate | 0.45 | Acceleration improvement rate | 0.50 | < 0.05 |
|  |  | 10s-G&R improvement rate | 0.49 | < 0.05 |

JOA, Japanese Orthopedic Association; UEF, upper extremity function; G&R, grip and release; STEF, Simple Test for Evaluating Hand Function
