# Supplementary material for: Kinematic characteristics of multi-directional reaching movement in degenerative cervical myelopathy
Source: Research Square preprint supplement (doi:10.21203/rs.3.rs-8556269/v1), 2026-01-21
Supplement: Supplementary file 2 [file a72682016efc8d94536c13a5.docx]

Table 2：Correlation between the kinematic parameters in the multi-directional reaching task and clinical outcomes.

|  |  | JOA-UEF recovery rate (%) | | | | |  | STEF improvement rate (%) | | | | |  |
| --- | --- | --- | --- | --- | --- | --- | --- | --- | --- | --- | --- | --- | --- |
|  |  | r | |  | *P* value | |  | r | |  | *P* value | |  |
| Improvement rate (%) |  |  |  |  |  |  |  |  |  |  |  |  |  |
| Acceleration |  |  | 0.28 |  |  | 0.23 |  |  | 0.44 |  | < | 0.05 |  |
| Movement time |  |  | 0.05 |  |  | 0.84 |  |  | 0.30 |  |  | 0.18 |  |
| Movement distance |  | - | 0.25 |  |  | 0.28 |  |  | 0.15 |  |  | 0.50 |  |

JOA, Japanese Orthopedic Association; UEF, upper extremity function; STEF, Simple Test for Evaluating Hand Function
