# Supplementary material for: Kinematic characteristics of multi-directional reaching movement in degenerative cervical myelopathy
Source: Research Square preprint supplement (doi:10.21203/rs.3.rs-8556269/v1), 2026-01-21
Supplement: Supplementary file 3 [file d27ad2d2acf024954afd8e4d.docx]

Table 1：Summarized data from reaching tasks and clinical outcomes before and after surgery.

| Parameter |  | Pre-operative |  | Post-operative |  | *P* value | |  |
| --- | --- | --- | --- | --- | --- | --- | --- | --- |
| Single-directional reaching (n = 13) |  |  |  |  |  |  |  |  |
| Acceleration (m/s2) |  | 13.74 ± 6.04 |  | 12.87 ± 5.37 |  |  | 0.70 |  |
| Movement time (seconds) |  | 1.10 ± 0.29 |  | 1.09 ± 0.40 |  |  | 0.96 |  |
| Movement distance (meters) |  | 0.49 ± 0.08 |  | 0.51 ± 0.15 |  |  | 0.72 |  |
|  |  |  |  |  |  |  |  |  |
| Multi-directional reaching (n = 25) |  |  |  |  |  |  |  |  |
| Acceleration (m/s2) |  | 8.54 ± 2.48 |  | 9.24 ± 2.62 |  | **<** | **0.05** |  |
| Movement time (seconds) |  | 0.87 ± 0.23 |  | 0.80 ± 0.18 |  | **<** | **0.01** |  |
| Movement distance (meters) |  | 0.31 ± 0.05 |  | 0.30 ± 0.04 |  |  | 0.30 |  |
|  |  |  |  |  |  |  |  |  |
| Clinical outcomes (n = 25) |  |  |  |  |  |  |  |  |
| JOA-UEF (score) |  | 4.6 ± 1.8 |  | 5.6 ± 0.6 |  | **<** | **0.05** |  |
| Grip strength (kg) |  | 25.3 ± 10.1 |  | 25.4 ± 9.4 |  |  | 0.85 |  |
| 10-s G&R test (number) |  | 15.1 ± 5.0 |  | 17.3 ± 4.5 |  | **<** | **0.05** |  |
| Two discriminations (mm) |  |  |  |  |  |  |  |  |
| Thumb |  | 6.1 ± 1.8 |  | 5.8 ± 1.5 |  |  | 0.25 |  |
| Index finger |  | 5.6 ± 2.1 |  | 5.3 ± 1.6 |  |  | 0.58 |  |
| STEF (seconds) |  | 64.0 ± 38.7 |  | 47.6 ± 19.3 |  | **<** | **0.01** |  |
| Visual Analog Scale (mm) |  |  |  |  |  |  |  |  |
| Neck or Shoulder |  | 50.5 ± 27.3 |  | 20.8 ± 21.5 |  | **<** | **0.01** |  |
| Arm or Hands |  | 43.3 ± 29.7 |  | 12.7 ± 19.9 |  | **<** | **0.01** |  |

JOA, Japanese Orthopedic Association; UEF, upper extremity function; G&R, grip and release; STEF, Simple Test for Evaluating Hand Function
